# Supplementary material for: Loss of Proximal Tubular Sirtuin 6 Aggravates Unilateral Ureteral Obstruction-Induced Tubulointerstitial Inflammation and Fibrosis by Regulation of β-Catenin Acetylation
Source: MDPI journal article supplement (doi:10.3390/cells11091477), 2022-04-27
Supplement: s1 [file s1]

## Supplementary data

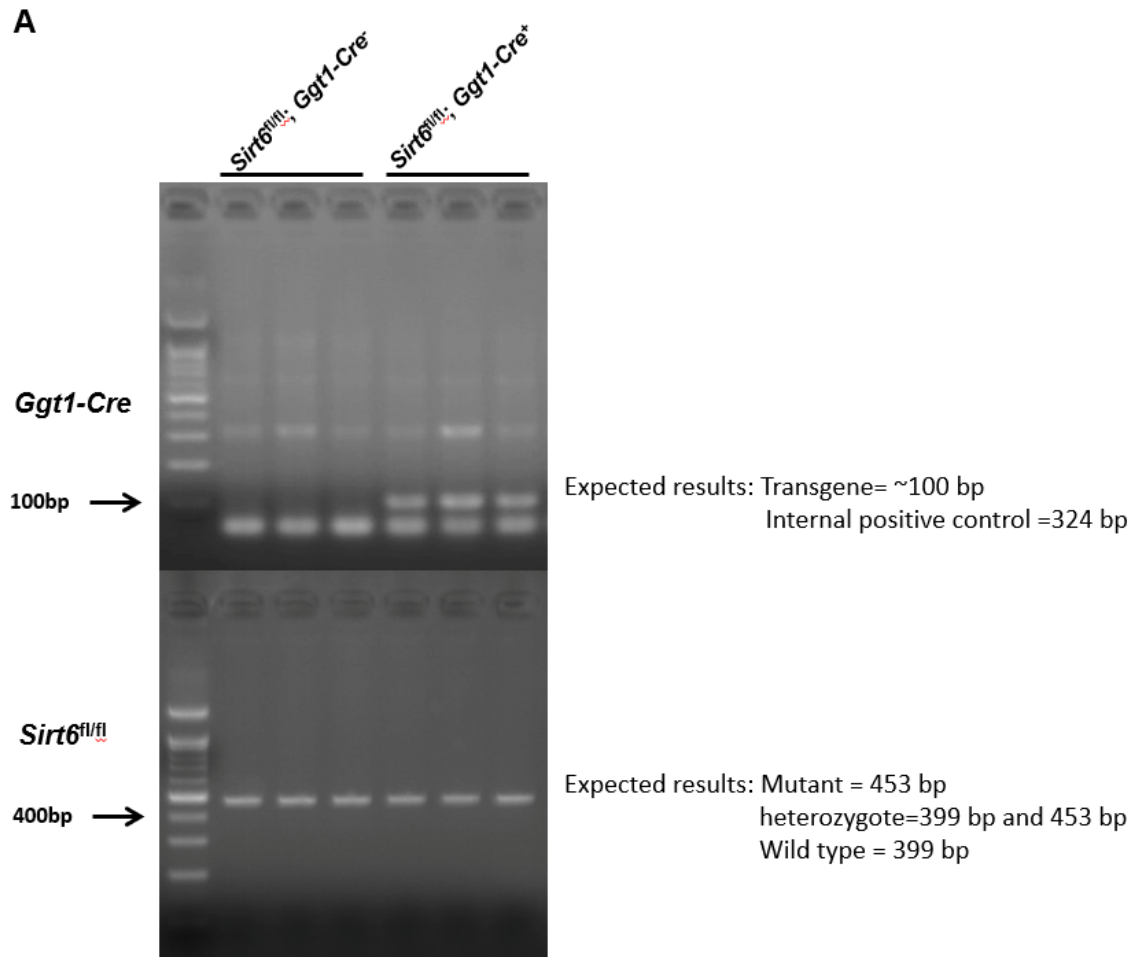

**Figure S1. Genotype for PT-sirt6KO mice.** Representative RT-PCR for proximal tubule-specific *Sirt6* knockout mice after crossing *Sirt6<sup>fllox/fllox</sup>* (*Sirt6<sup>tm1.1Cxd</sup>/J*) and homozygous  $\gamma$ -glutamyl transferase Cre mice (*Tg-(Ggt1-Cre)M3Egn/J*).
